# Supplementary material for: A rational strategy for substantially enhancing the solar-utilization efficiency and organic-pollutant-degradation rate via mediated central processing unit filling
Source: Royal Society of Chemistry journal article supplement (doi:10.1039/d3se00203a), 2023-01-01
Supplement: d3se00203a1.pdf [file d3se00203a1.pdf]

## Supporting Information

### A Rational Strategy for Substantially Enhanced Solar Utilization Efficiency and Organic Pollutant Degradation Rate

#### Via Mediated Central Processing Unit Filling

Nana Li<sup>a</sup>, Baohui Wang<sup>a, \*</sup>, Meng Wang<sup>a</sup>, Lei Tao<sup>a</sup>, Chaoying Li<sup>a</sup>, Zhiqiang Qiao<sup>a</sup>, Di Gu<sup>a</sup>, Lingyue Zhu<sup>a</sup>, Dandan Yuan<sup>a</sup>, Hongjun Wu<sup>a</sup>, Xirui Wang<sup>b, \*\*</sup>

<sup>a</sup> College of Chemistry & Chemical Engineering, Northeast Petroleum University, Daqing, 163318, China

<sup>b</sup> Department of Chemistry, George Washington University, Washington DC, 20052, United States

#### Supplementary experimental section

##### Chemicals

Phenol (C<sub>6</sub>H<sub>6</sub>O, AR, Shanghai Aladdin), sodium sulfate (Na<sub>2</sub>SO<sub>4</sub>, AR, Tianjin Damao Chemical), quartz sand (Neutral, AR, Shanghai Macklin), alumina (Neutral, Al<sub>2</sub>O<sub>3</sub>, AR, Shanghai Yuanjiang Chemical), sulfuric acid (H<sub>2</sub>SO<sub>4</sub>, AR, Shenyang Chemical), sodium hydroxide (NaOH, AR, Shenyang Chemical), potassium dichromate (K<sub>2</sub>Cr<sub>2</sub>O<sub>7</sub>, AR, Shenyang Chemical), ferrous sulfate (FeSO<sub>4</sub>·7H<sub>2</sub>O, AR, Shanghai Macklin), O-phenanthroline (C<sub>12</sub>H<sub>8</sub>N<sub>2</sub>·H<sub>2</sub>O, AR, Shanghai Aladdin), silver

---

\* Corresponding author. College of Chemistry & Chemical Engineering, Northeast Petroleum University, Daqing, 163318, China. E-mail address: wangbh@nepu.edu.cn (B.H. Wang).

\*\* Corresponding author. Department of Chemistry, George Washington University, Washington, DC, 20052, United States. E-mail address: fagelink@gmail.com (X.R. Wang).

sulfate ( $\text{Ag}_2\text{SO}_4$ , AR, Tianjin Damao Chemical), ammonium ferrous sulfate ( $(\text{NH}_4)_2\text{Fe}(\text{SO}_4)_2 \cdot 6\text{H}_2\text{O}$ , AR, Shanghai Macklin).

All aqueous solutions were prepared with deionized water. 200 ppm of phenol and 15,000 ppm of  $\text{Na}_2\text{SO}_4$  electrolyte were contained in the simulated wastewater.

### **Electrodes**

The DSA [1-2], Pt, Fe and Ni electrodes were tested at the beginning of experiments, separately. The brown intermediate products were generated and the fillings were easily contaminated when Pt was employed. Fe sheets were corroded more severely, even with corrosion holes clearly visible on the surface. The phenomena above mentioned were none occurred as Ni and DSA were applied. The degradation rates of both Ni and DSA on the target pollutants were similar as well as the ability to decrease the value of COD. But the Ni flakes are nearly only 2% of the cost of commercial DSA electrodes for the same area. Consequently, Ni was considered as the most suitable material for electrodes in continuous system.

### **Central processing unit**

The interface between the crucible and the stainless-steel frame was sealed with PTFE ring to ensure gas tightness. The inlet and outlet tubes were attached to the cover with heat-resistant black rubber. The PTFE tape and black rubber were used between the electrode wire and the insulation sleeve to prevent gas escaping from here. A check valve was installed between the inlet pipe and the reactor, likewise between the outlet pipe and the condensing unit.

### **Solar collector**

Parabolic solar concentrator was used to focus the sun's rays to supply the high-heat required for chemical reaction. Diameter of the solar collector is about 150 cm and the maximum temperature can reach 500 °C at the focus. The reflector is able to concentrate the sunrays into a light spot of ~ 5 cm in diameter [3]. The orientation of the reflector can be set to face the sun by means of the manual control device and it can be adjusted to the changing angle of the solar radiation in order to make sure that the continuous reactor is in the central focus [4].

### **Solar panels**

The lithium battery box 18650 was used to store and release electricity. The battery was charged by photovoltaic panels with an effective area of 60 cm<sup>2</sup> for the indoor experiments, however, the charging process might take 2-4 days. The maximum output voltage of the USB side of the battery box is 5 V and the current is 2100 mA. The output voltage can be adjusted to a range between 0.5 V and 30 V by connecting the micro-regulator to the socket. The input voltage of the micro-regulator is 5-12 V.

### **Solid media**

The solid fillings were cleaned prior to use, including steps such as soaking, washing and drying. Moreover, the solid fillings were dried at 120 °C for 2 h before each experiment. The comparison experiment was set up to identify the presence of excess water in the medium which may affect experiments.

The adsorption capacity of Al<sub>2</sub>O<sub>3</sub> on pollutants was tested to eliminate potential interference for wastewater treatment. The appropriate amount of simulated wastewater and the same amount of alumina media as the experiments were placed in hermetic

vessel. Samples were collected at different time intervals (1 h) after constant stirring and scanned with the UV spectrometer to determine concentration of phenol. The solid media ( $\text{Al}_2\text{O}_3$ ) after high-temp reactions was tested accordingly.  $\text{Al}_2\text{O}_3$  were placed into the sealed bottle containing deionized water. Next, sonication for 0.5 h and stirring for 3 h were carried out, respectively. After soaking overnight, the supernatant was analyzed by the UV spectrometer. The same sonication and immersion operations were performed on the corundum crucible after every experiment, but except the stirring process.

$\text{Al}_2\text{O}_3$  media after reusing were packed into the high borosilicate glass bottle and 1M NaOH was poured. The solid fillings were separated by centrifuge after sonicating, washing and acidifying. After above steps, the media were dried at 200 °C under  $\text{N}_2$ , and stored in the desiccation vial.

#### **Detection and analysis methods**

UV spectrophotometer was used to detect the concentration of phenol (the characteristic absorption peak appears at 270 nm). The correlation fitting curve between concentration and absorbance value with a relevance rate of 99.99% was firstly established, then the concentration of phenol in solution could be calculated by the standard equation.

The COD value of solution was determined by the standard potassium dichromate titration method. The titration procedures should be repeated three to five times for the same water sample in order to lessen experimental error.

Morphology of the filling media before and after reactions were analyzed by

scanning electron microscope (SEM). Crystal lattice structure of solid filler was investigated by X-Ray Diffraction (XRD).

### Supplementary figures

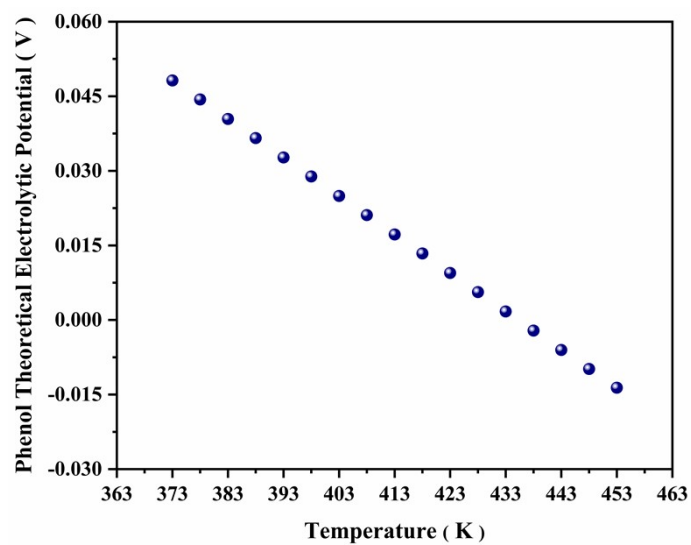

Fig.S1 Electrolytic potential with various temperature

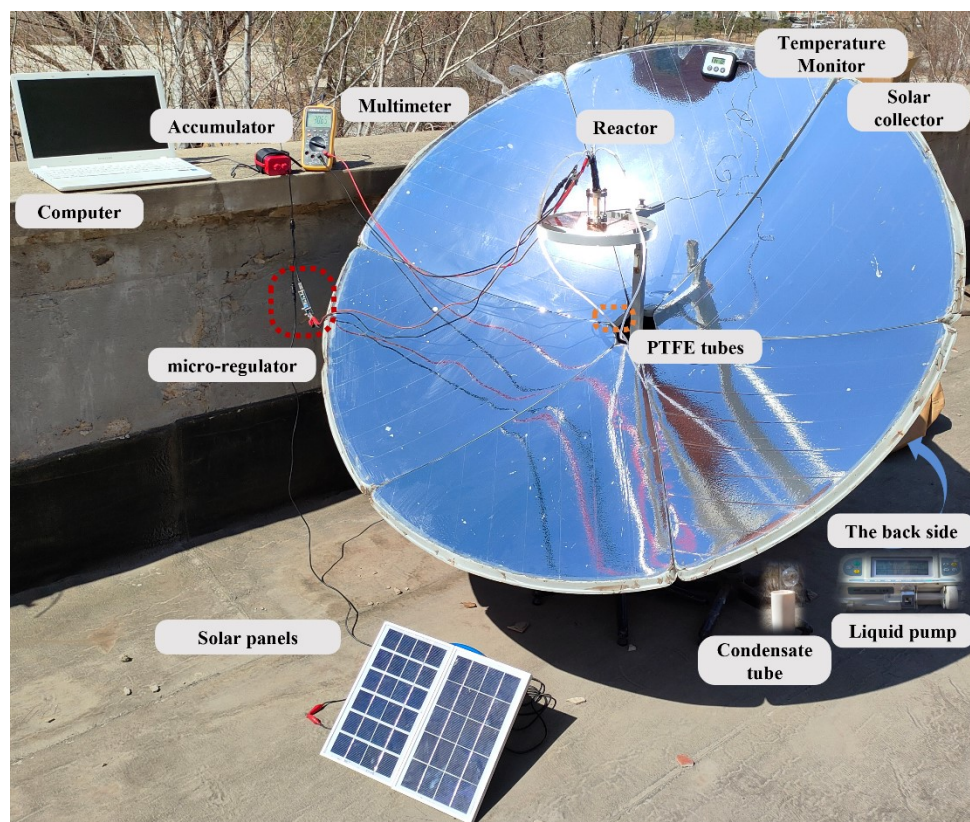

Fig. S2 Outdoor experimental device

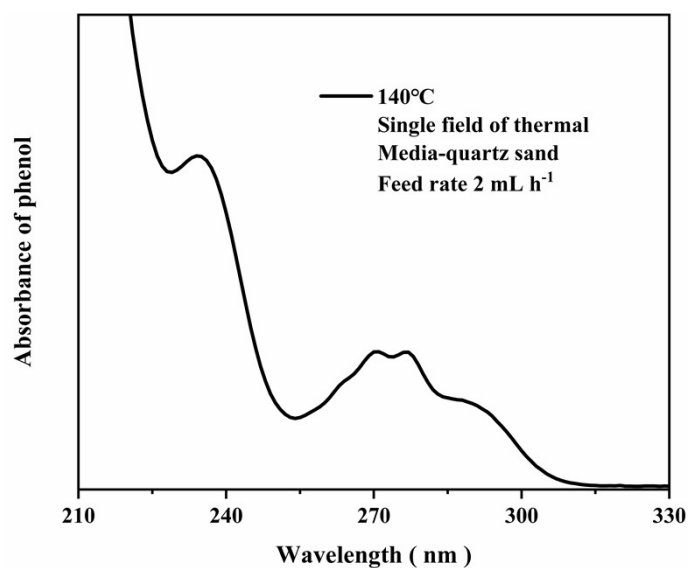

Fig.S3 UV spectrum of phenol under the single field of thermal at 140 °C

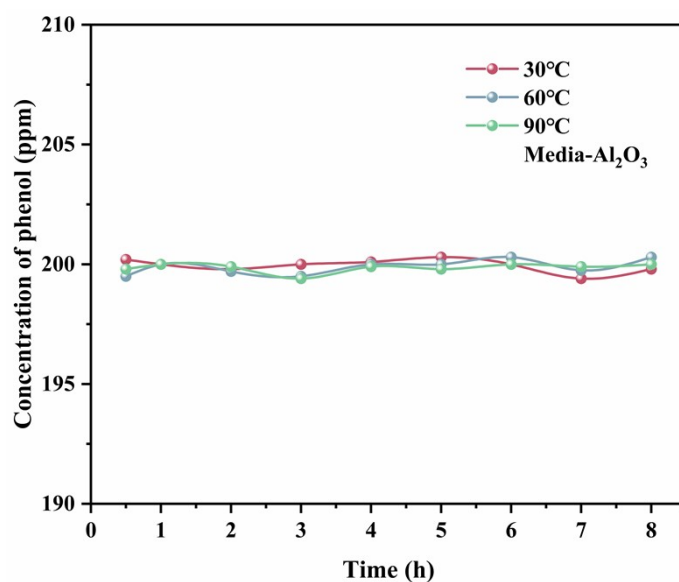

Fig.S4 Concentration of phenol with adsorption time at different temperatures

## Reference

- [1] Krstić V, Pešovski B. Novel multifunctional two layer catalytic activated titanium electrodes for various technological and environmental processes [J]. *Arabian Journal of Chemistry*, 14.4 (2021), 103101.

- [2] Abidi J, Clematis D, Samet Y, *et al.* Influence of anode material and chlorides in the new-gen solid polymer electrolyte cell for electrochemical oxidation– Optimization of Chloroxylenol degradation with response surface methodology [J]. *Journal of Electroanalytical Chemistry*, 920 (2022), 116584
- [3] Yuan DD, Tian L, Gu D, *et al.* Fast and efficient oxidation of formaldehyde in wastewater via the Solar Thermal Electrochemical Process tuned by thermo-electrochemistry [J]. *Journal of Cleaner Production*, 156 (2017), 310-316.
- [4] Zhu LY, Zhu YJ, Gu D, *et al.* Solar STEP coal conversion: Fully solar-driven thermos- and electrochemical process for efficient transformation of coal to light fuel plus hydrogen [J]. *Applied Catalysis B: Environmental*, 209 (2017), 372-382.
